# Supplementary material
Source: Elsevier journal article supplement (https://www.sciencedirect.com/science/article/pii/S0210569122000389)
Supplement: mmc1 [file S0210569122000389:mmc1.pdf]

## Supplemental digital content 1- Differences between study cohort and follow-up loss group.

| Variable                           | Study cohort<br>n=128 (100%) | Follow-up loss<br>n=84 (100%) | p                  |
|------------------------------------|------------------------------|-------------------------------|--------------------|
| <b>Preexisting characteristics</b> |                              |                               |                    |
| Admission age                      | 16 (5-54)                    | 12.5 (3-97.5)                 | 0.62 <sup>b</sup>  |
| Sex, Male                          | 81 (63)                      | 57 (68)                       | 0.59 <sup>a</sup>  |
| Premature Birth                    | 41 (32)                      | 22 (28)                       | 0.51 <sup>a</sup>  |
| Chronic condition                  | 91 (71)                      | 39 (46)                       | 0.001 <sup>a</sup> |
| Baseline functional status         |                              |                               |                    |
| Good/Normal                        | 88 (69)                      | 63 (76)                       | 0.52 <sup>c</sup>  |
| Mildly abnormal                    | 29 (23)                      | 15 (18)                       |                    |
| Moderately abnormal                | 11 (8)                       | 5 (6)                         |                    |
| <b>Critical illness factors</b>    |                              |                               |                    |
| PIM2                               | 1.25 (0.46-2.90)             | 0.83 (0.22-5.07)              | 0.39 <sup>b</sup>  |
| Admission reason                   |                              |                               |                    |
| Neurologic                         | 13 (10)                      | 8 (10)                        | 0.002 <sup>c</sup> |
| Respiratory                        | 37 (29)                      | 46 (55)                       |                    |
| Surgical                           | 48 (37)                      | 18 (21)                       |                    |
| Others                             | 30 (23)                      | 12 (14)                       |                    |
| Sedative use                       | 96 (75)                      | 65 (77)                       | 0.81 <sup>a</sup>  |
| Sedative time, days                | 1 (1-4)                      | 2 (1-5)                       | 0.07 <sup>b</sup>  |
| Neuromuscular blockade             | 24 (19)                      | 15 (18)                       | 1.00 <sup>a</sup>  |
| Adverse event/complication         | 42 (33)                      | 32 (38)                       | 0.52 <sup>a</sup>  |
| IMV use                            | 68 (53)                      | 40 (48)                       | 0.52 <sup>a</sup>  |
| IMV time, days                     | 1 (0-4)                      | 0 (0-5.75)                    | 0.92 <sup>b</sup>  |
| PICU length of stay                | 5 (3-10)                     | 6.5 (3-10.75)                 | 0.38 <sup>b</sup>  |
| Discharge functional status        |                              |                               | 0.38 <sup>c</sup>  |
| Good/Normal                        | 41 (32)                      | 24 (29)                       |                    |
| Mildly abnormal                    | 28 (22)                      | 28 (33)                       |                    |
| Moderately abnormal                | 45 (35)                      | 24 (29)                       |                    |
| Severely abnormal                  | 11 (9)                       | 5 (6)                         |                    |
| Very severely abnormal             | 3 (2)                        | 3 (3)                         |                    |

Variables described as the median and interquartile range (IQR 25-75), absolute numbers (n), and frequency (%); IMV = Invasive mechanical ventilation. <sup>a</sup> Yates Continuity correction, <sup>b</sup> Mann Whitney- U Test. <sup>c</sup> Pearson Qui-square, <sup>d</sup> Fisher Exact teste.

Supplemental digital content 2 - Simple regression analysis between variables related to patient's previous conditions, critical illness factors, and one-year functional outcomes.

| Variables                           | RR (95% CI)     | p      |
|-------------------------------------|-----------------|--------|
| <b>Pre-existing characteristics</b> |                 |        |
| Admission age, months               |                 | 0.03   |
| 1 to 12                             | Ref.            | ----   |
| 13 to 48                            | 0.46(0.22-0.95) | 0.06   |
| ≥ 49                                | 0.58(0.32-1.02) | 0.03   |
| Previous chronic condition          | 1.72(0.88-3.37) | 0.10   |
| Premature birth                     | 1.62(1.04-2.73) | 0.03   |
| Baseline functional status          |                 | 0.001  |
| Good/Normal                         | Ref.            | ----   |
| Mildly abnormal                     | 2.57(1.57-4.21) | <0.001 |
| Moderately abnormal                 | 2.00(0.94-4.24) | 0.07   |
| <b>Critical illness factors</b>     |                 |        |
| Admission reason                    |                 | 0.03   |
| Neurologic                          | 2.30(1.10-4.80) | 0.02   |
| Respiratory                         | 1.31(0.63-2.75) | 0.46   |
| Surgical procedure                  | 1.01(0.47-2.15) | 0.96   |
| Others                              | Ref.            | ----   |
| PIM2,                               |                 | 0.89   |
| 0.1 to 4.99%                        | Ref.            | ----   |
| ≥ 5.00%                             | 0.95(0.45-1.99) | 0.89   |
| Adverse event/complication          | 1.69(1.04-2.74) | 0.04   |

| Variables                       | RR (95% CI)       | p      |
|---------------------------------|-------------------|--------|
| Sedative time, (days)           |                   | 0.02   |
| No sedative use                 | Ref.              | ----   |
| 1 to 3                          | 0.92(0.49-1.72)   | 0.80   |
| 4 to 10                         | 0.80(0.35-1.81)   | 0.60   |
| ≥ 10                            | 2.14(1.07-4.27)   | 0.03   |
| Neuromuscular blockade          | 0.86(0.43-1.71)   | 0.68   |
| IMV time (days)                 |                   | 0.11   |
| No IMV use                      | Ref.              | ----   |
| 1 to 3                          | 1.25(0.64—2.41)   | 0.50   |
| 4 to 10                         | 1.33(0.69-2.56)   | 0.37   |
| ≥ 11                            | 2.25(1.16-4.34)   | 0.01   |
| Length of stay (days),          |                   | 0.03   |
| 1 to 3                          | Ref.              | ----   |
| 4 to 10                         | 1.35(0.66-2.73)   | 0.40   |
| ≥ 11                            | 2.27(1.11-4.65)   | 0.02   |
| Functional decline at discharge | 8.06(2.64-24.68)  | <0.001 |
| Discharge functional status     |                   | <0.001 |
| Good/Normal                     | Ref.              | ----   |
| Mildly abnormal                 | 2.92(0.57-14.91)  | 0.19   |
| Moderately abnormal             | 10.93(2.75-43.41) | 0.001  |
| Severely/very severely abnormal | 17.57(4.47-69.04) | <0.001 |

Dependent variable: Functional outcome after one year (good/unchanged, poor).

RR = Relative risk; 95%CI = Confidence interval; PIM2= Pediatric Index of Mortality; IMV = Invasive mechanical ventilation. Ref. means reference category.
